# Supplementary material for: Characteristics of Korean Patients with Primary Adrenal Insufficiency: A Registry-Based Nationwide Survey in Korea
Source: PubMed Central journal article supplement — Endocrinol Metab (Seoul). 2017 Dec 14;32(4):466–74. doi: 10.3803/EnM.2017.32.4.466 (PMC5744733; doi:10.3803/enm.2017.32.4.466), 2017-12-14
Supplement: enm-32-466-s001.pdf [file enm-32-466-s001.pdf]

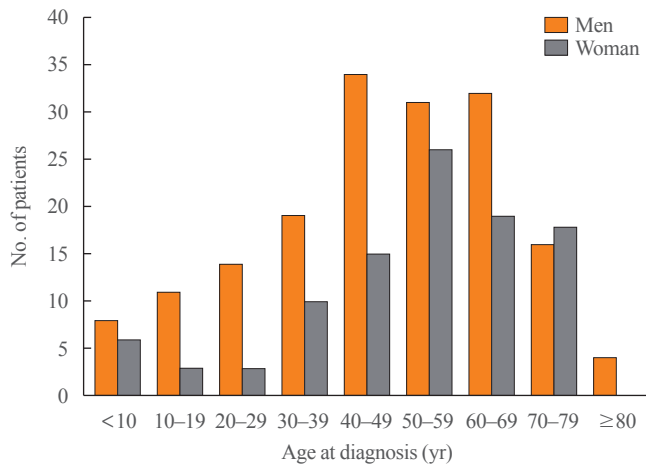

**Supplemental Fig. S1.** Distribution of age at diagnosis in men (orange bars) and women (gray bars) patients with primary adrenal insufficiency.
